# Supplementary material for: The chalcogen bond: can it be formed by oxygen?
Source: Royal Society of Chemistry journal article supplement (doi:10.1039/c9cp03783g), 2019-01-01
Supplement: c9cp03783g1.pdf [file c9cp03783g1.pdf]

# The Chalcogen bond: Can it be Formed by Oxygen?

Pradeep R. Varadwaj<sup>1,2,\*</sup> Arpita Varadwaj<sup>1,2</sup> Helder M. Marques<sup>3</sup>, and Preston J. MacDougall<sup>4</sup>

<sup>1</sup> Department of Chemical System Engineering, School of Engineering, The University of Tokyo 7-3-1, Tokyo 113-8656, Japan

<sup>2</sup> The National Institute of Advanced Industrial Science and Technology (AIST), Tsukuba 305-8560, Japan

<sup>3</sup> Molecular Sciences Institute, School of Chemistry, University of the Witwatersrand, Johannesburg 2050, South Africa

<sup>4</sup> Department of Chemistry, Box X101 Middle Tennessee State University, Murfreesboro, TN 37132

\* Corresponding author's address: pradeep@t.okayama-u.ac.jp

## Supplementary information

Table S1: Reported van der Waals radii of atoms used in this study (values in Å) for the assignment of intermolecular interactions between bonded atomic basins.

| Atom | Bondi | Alvarez | Interaction | vdW(O)+vdW(X)(Alvarez) |
|------|-------|---------|-------------|------------------------|
| H    | 1.20  | 1.20    | O···H       | 2.70                   |
| C    | 1.70  | 1.77    | O···C       | 3.27                   |
| N    | 1.55  | 1.66    | O···N       | 3.16                   |
| O    | 1.52  | 1.50    | O···O       | 3.00                   |
| F    | 1.47  | 1.46    | O···F       | 2.96                   |
| S    | 1.80  | 1.89    | O···S       | 3.39                   |
| Cl   | 1.75  | 1.82    | O···Cl      | 3.32                   |
| Br   | 1.83  | 1.86    | O···Br      | 3.36                   |

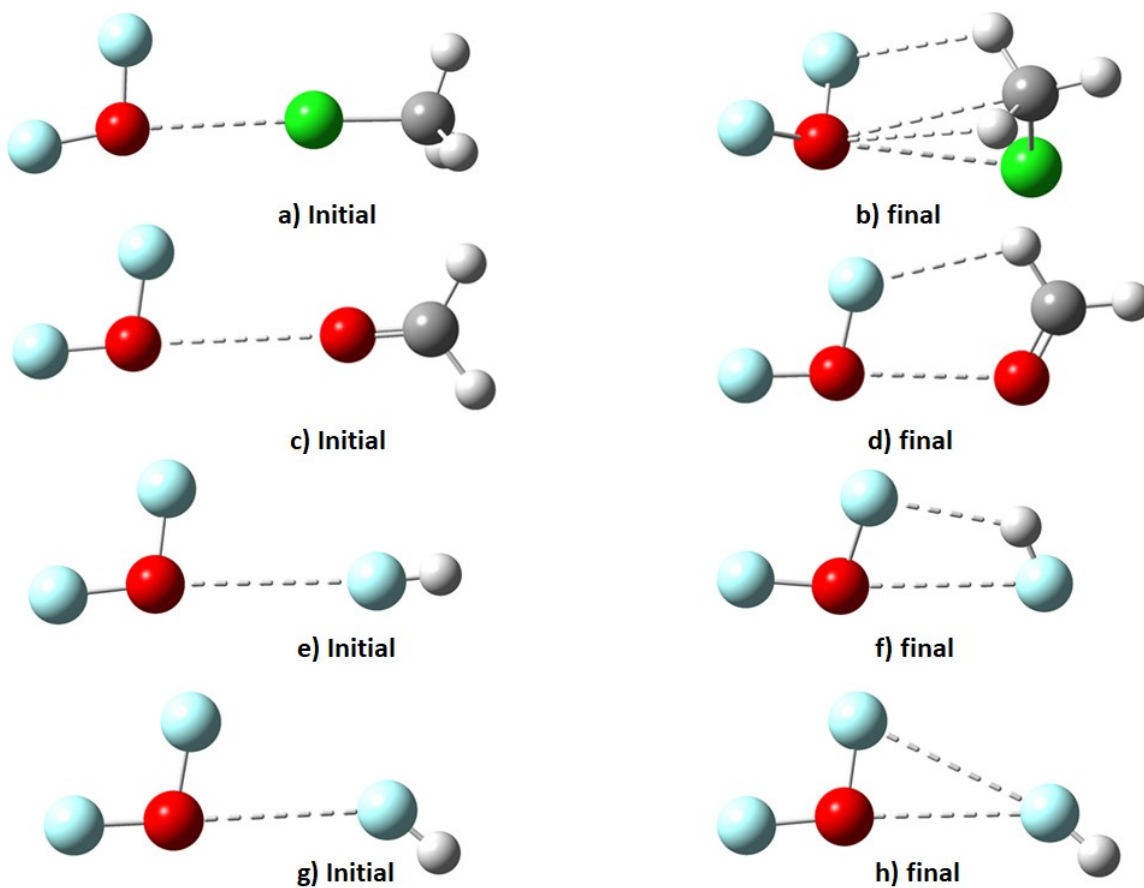

Figure S1. Examples showing the initial and final (M06-2X/aug-cc-pVTZ energy-minimized) geometries of some selected OF<sub>2</sub> binary complexes of a-b) CH<sub>3</sub>Cl, c-d) H<sub>2</sub>CO, e-f) HF and g-h) HF. Both M06-2X and MP2 methods produced similar complex geometries. Figure 4 shows the details of the M06-2X/aug-cc-pVTZ energy-minimized geometries of all the complexes
